# Supplementary material for: Relevant pH and lipase for in vitro models of gastric digestion
Source: Royal Society of Chemistry journal article supplement (doi:10.1039/c5fo00930h), 2015-10-21
Supplement: c5fo00930h1.pdf [file c5fo00930h1.pdf]

## Supplementary Data

### Relevant pH and lipase for *in vitro* models of gastric digestion

Laura Sams<sup>a,b</sup>, Julie Paume<sup>b</sup>, Jacqueline Giallo<sup>b</sup> and Frédéric Carrière<sup>a\*</sup>

<sup>a</sup> CNRS, Aix Marseille Université, Enzymologie Interfaciale et Physiologie de la Lipolyse UMR7282, 31 Chemin Joseph Aiguier, 13402 Marseille Cedex 20, France

<sup>b</sup> GERME S.A., Technopôle Marseille Provence Château-Gombert, ZAC la Baronne, 12 Rue Marc Donadille, 13013 Marseille

*List of the 340 articles with “in vitro digestion” in their title, used for statistics on in vitro digestion models:*

Aarak, K., B. Kirkhus, et al. (2013). "Release of EPA and DHA from salmon oil—a comparison of in vitro digestion with human and porcine gastrointestinal enzymes." British Journal of Nutrition **110**(08): 1402-1410.

Aarak, K. E., B. Kirkhus, et al. (2014). "Effect of broccoli phytochemical extract on release of fatty acids from salmon muscle and salmon oil during in vitro digestion." Food & function **5**(9): 2331-2337.

Aarak, K. E., N. M. Rigby, et al. (2013). "The impact of meal composition on the release of fatty acids from salmon during in vitro gastrointestinal digestion." Food & function **4**(12): 1819-1826.

Abdalla, A., S. Klein, et al. (2008). "A new self-emulsifying drug delivery system (SEDDS) for poorly soluble drugs: characterization, dissolution, in vitro digestion and incorporation into solid pellets." European Journal of Pharmaceutical Sciences **35**(5): 457-464.

Aditya, N., M. Shim, et al. (2013). "Curcumin and genistein coloaded nanostructured lipid carriers: in vitro digestion and antiprostata cancer activity." Journal of agricultural and food chemistry **61**(8): 1878-1883.

Afonso, C., S. Costa, et al. (2015). "Evaluation of the risk/benefit associated to the consumption of raw and cooked farmed meagre based on the bioaccessibility of selenium, eicosapentaenoic acid and docosahexaenoic acid, total mercury, and methylmercury determined by an in vitro digestion model." Food Chemistry **170**: 249-256.

- Amara, S., A. Patin, et al. (2014). "In vitro digestion of citric acid esters of mono-and diglycerides (CITREM) and CITREM-containing infant formula/emulsions." Food & function **5**(7): 1409-1421.
- Amoroso, A., G. Maga, et al. (2013). "Cytotoxicity of  $\alpha$ -dicarbonyl compounds submitted to in vitro simulated digestion process." Food Chemistry **140**(4): 654-659.
- Anby, M. U., T.-H. Nguyen, et al. (2014). "An in vitro digestion test that reflects rat intestinal conditions to probe the importance of formulation digestion vs first pass metabolism in danazol bioavailability from lipid based formulations." Molecular pharmaceutics **11**(11): 4069-4083.
- Andriamihaja, M., A. Guillot, et al. (2013). "Comparative efficiency of microbial enzyme preparations versus pancreatin for in vitro alimentary protein digestion." Amino acids **44**(2): 563-572.
- Argyri, K., E. Theophanidi, et al. (2011). "Iron or zinc dialyzability obtained from a modified in vitro digestion procedure compare well with iron or zinc absorption from meals." Food Chemistry **127**(2): 716-721.
- Augustin, M. A., L. Sanguansri, et al. (2014). "Digestion of microencapsulated oil powders: in vitro lipolysis and in vivo absorption from a food matrix." Food Funct. **5**(11): 2905-2912.
- Aviles, B., C. Klotz, et al. (2013). "Biofilms promote survival and virulence of Salmonella enterica sv. Tennessee during prolonged dry storage and after passage through an in vitro digestion system." International journal of food microbiology **162**(3): 252-259.
- Bae, I. Y. and H. G. Lee (2014). "In vitro starch digestion and cake quality: Impact of the ratio of soluble and insoluble dietary fiber." International journal of biological macromolecules **63**: 98-103.
- Baker, I., M. Chohan, et al. (2013). "Impact of cooking and digestion, in vitro, on the antioxidant capacity and anti-inflammatory activity of cinnamon, clove and nutmeg." Plant Foods for Human Nutrition **68**(4): 364-369.
- Bateman, L., A. Ye, et al. (2010). "In vitro digestion of  $\beta$ -lactoglobulin fibrils formed by heat treatment at low pH." Journal of agricultural and food chemistry **58**(17): 9800-9808.
- Bax, M.-L., T. Sayd, et al. (2013). "Muscle composition slightly affects in vitro digestion of aged and cooked meat: Identification of associated proteomic markers." Food Chemistry **136**(3): 1249-1262.
- Beeren, S. R., C. E. Christensen, et al. (2015). "Direct study of fluorescently-labelled barley  $\beta$ -glucan fate in an in vitro human colon digestion model." Carbohydrate polymers **115**: 88-92.
- Benson, K. F., K. J. Ruff, et al. (2012). "Effects of natural eggshell membrane (NEM) on cytokine production in cultures of peripheral blood mononuclear cells: increased suppression of tumor necrosis factor- $\alpha$  levels after in vitro digestion." Journal of medicinal food **15**(4): 360-368.
- Berez, B., E. C. Mills, et al. (2013). "Stability of sunflower 2S albumins and LTP to physiologically relevant in vitro gastrointestinal digestion." Food Chemistry **138**(4): 2374-2381.
- Berthelsen, R., R. Holm, et al. (2015). "Kolliphor Surfactants Affect Solubilization and Bioavailability of Fenofibrate. Studies of in Vitro Digestion and Absorption in Rats." Molecular pharmaceutics **12**(4): 1062-1071.

- Bhagavan, H. N., R. K. Chopra, et al. (2007). "Assessment of coenzyme Q10 absorption using an in vitro digestion-Caco-2 cell model." International journal of pharmaceutics **333**(1): 112-117.
- Boato, F., G. M. Wortley, et al. (2002). "Red grape juice inhibits iron availability: application of an in vitro digestion/Caco-2 cell model." Journal of agricultural and food chemistry **50**(23): 6935-6938.
- Bolko, K., A. Zvonar, et al. (2013). "Simulating the digestion of lipid-based drug delivery systems (LBDDS): overview of in vitro lipolysis models." Acta chimica Slovenica **61**(1): 1-10.
- Bordoni, A., G. Picone, et al. (2011). "NMR comparison of in vitro digestion of Parmigiano Reggiano cheese aged 15 and 30 months." Magnetic Resonance in Chemistry **49**(S1): S61-S70.
- Bornhorst, G. M. and R. Paul Singh (2014). "Gastric digestion in vivo and in vitro: how the structural aspects of food influence the digestion process." Annu Rev Food Sci Technol **5**: 111-132.
- Bornhorst, G. M., M. J. Roman, et al. (2014). "Physical property changes in raw and roasted almonds during gastric digestion in vivo and in vitro." Food biophysics **9**(1): 39-48.
- Bourlieu, C., O. Ménard, et al. (2015). "The structure of infant formulas impacts their lipolysis, proteolysis and disintegration during in vitro gastric digestion." Food Chemistry **182**: 224-235.
- Boyer, J., D. Brown, et al. (2005). "In vitro digestion and lactase treatment influence uptake of quercetin and quercetin glucoside by the Caco-2 cell monolayer." Nutr J **4**(1): 1-15.
- Brandon, E. F., A. G. Oomen, et al. (2006). "Consumer product in vitro digestion model: Bioaccessibility of contaminants and its application in risk assessment." Regulatory Toxicology and Pharmacology **44**(2): 161-171.
- Brown, E. M., S. Nitecki, et al. (2014). "Comparison of in vivo and in vitro digestion on polyphenol composition in lingonberries: Potential impact on colonic health." BioFactors **40**(6): 611-623.
- Bussche, J. V., L. Y. Hemeryck, et al. (2014). "O6-carboxymethylguanine DNA adduct formation and lipid peroxidation upon in vitro gastrointestinal digestion of haem-rich meat." Molecular nutrition & food research **58**(9): 1883-1896.
- Cabañero, A. I., Y. Madrid, et al. (2007). "Mercury–selenium species ratio in representative fish samples and their bioaccessibility by an in vitro digestion method." Biological Trace Element Research **119**(3): 195-211.
- Calatayud, M., E. Bralatei, et al. (2013). "Transformation of Arsenic Species during in Vitro Gastrointestinal Digestion of Vegetables." Journal of agricultural and food chemistry **61**(49): 12164-12170.
- Caldwell, K. A. (1980). "In vitro digestion of gliadin by gastrointestinal enzymes and by pyrrolidonecarboxylate peptidase." The American journal of clinical nutrition **33**(2): 293-302.
- Cardinali, A., V. Linsalata, et al. (2011). "Verbascosides from Olive Mill Waste Water: Assessment of Their Bioaccessibility and Intestinal Uptake Using an In Vitro Digestion/Caco-2 Model System." Journal of food science **76**(2): H48-H54.

- Cave, N. (1988). "Bioavailability of amino acids in plant feedstuffs determined by in vitro digestion, chick growth assay, and true amino acid availability methods." Poultry Science **67**(1): 78-87.
- Chan, D. Y., W. D. Black, et al. (2007). "Cadmium bioavailability and bioaccessibility as determined by in vitro digestion, dialysis and intestinal epithelial monolayers, and compared to in vivo data." Journal of Environmental Science and Health Part A **42**(9): 1283-1291.
- Chen, G.-L., S.-G. Chen, et al. (2014). "Total phenolic contents of 33 fruits and their antioxidant capacities before and after in vitro digestion." Industrial Crops and Products **57**: 150-157.
- Chen, L. and R. Phillips (2005). "Effects of twin-screw extrusion of peanut flour on in vitro digestion of potentially allergenic peanut proteins." Journal of Food Protection® **68**(8): 1712-1719.
- Chen, X., X. He, et al. (2015). "In vitro digestion and physicochemical properties of wheat starch/flour modified by heat-moisture treatment." Journal of Cereal Science **63**: 109-115.
- Cheng, D.-L., K. Hashimoto, et al. (2004). "In vitro digestion of sinigrin and glucotropaeolin by single strains of Bifidobacterium and identification of the digestive products." Food and chemical toxicology **42**(3): 351-357.
- Chiang, Y. C., C. L. Chen, et al. (2014). "Bioavailability of cranberry bean hydroalcoholic extract and its inhibitory effect against starch hydrolysis following in vitro gastrointestinal digestion." Food Research International **64**: 939-945.
- Cornell, H. (1988). "Amino acid composition of peptides remaining after in vitro digestion of a gliadin sub-fraction with duodenal mucosa from patients with coeliac disease." Clinica chimica acta **176**(3): 279-289.
- Cornell, H. J. (1998). "Partial in vitro digestion of active gliadin-related peptides in celiac disease." Journal of protein chemistry **17**(8): 739-744.
- Correa-Betanzo, J., E. Allen-Vercoe, et al. (2014). "Stability and biological activity of wild blueberry (*Vaccinium angustifolium*) polyphenols during simulated in vitro gastrointestinal digestion." Food Chemistry **165**: 522-531.
- Costa, P., T. Grevenstuk, et al. (2014). "Antioxidant and anti-cholinesterase activities of *Lavandula viridis* L'Hér extracts after in vitro gastrointestinal digestion." Industrial Crops and Products **55**: 83-89.
- Courraud, J., J. Berger, et al. (2013). "Stability and bioaccessibility of different forms of carotenoids and vitamin A during in vitro digestion." Food Chemistry **136**(2): 871-877.
- Cuomo, V., F. B. Luciano, et al. (2015). "Bioaccessibility of glucoraphanin from broccoli using an in vitro gastrointestinal digestion model." CyTA-Journal of Food **13**(3): 361-365.
- Daglia, M., D. Ferrari, et al. (2013). "Influence of in vitro simulated gastroduodenal digestion on methylglyoxal concentration of Manuka (*Lectospermum scoparium*) honey." Journal of agricultural and food chemistry **61**(9): 2140-2145.
- Daly, T., M. A. Jiwan, et al. (2010). "Carotenoid content of commonly consumed herbs and assessment of their bioaccessibility using an in vitro digestion model." Plant Foods for Human Nutrition **65**(2): 164-169.
- De Angelis, E., L. Monaci, et al. (2014). "Bioaccessibility of T-2 and HT-2 toxins in mycotoxin contaminated bread models submitted to in vitro human digestion." Innovative Food Science & Emerging Technologies **22**: 248-256.

- De Angelis, E., L. Monaci, et al. (2014). "Investigation on the stability of deoxynivalenol and DON-3 glucoside during gastro-duodenal in vitro digestion of a naturally contaminated bread model food." Food Control **43**: 270-275.
- De Godoy, M., B. Knapp, et al. (2013). "Blending of soluble corn fiber with pullulan, sorbitol, or fructose attenuates glycemic and insulinemic responses in the dog and affects hydrolytic digestion in vitro." Journal of animal science **91**(8): 3796-3806.
- De Godoy, M., B. Knapp, et al. (2014). "In vitro hydrolytic digestion, glycemic response in dogs, and true metabolizable energy content of soluble corn fibers." Journal of animal science **92**(6): 2447-2457.
- de Lima, A. C. S., D. J. Soares, et al. (2014). "In vitro bioaccessibility of copper, iron, zinc and antioxidant compounds of whole cashew apple juice and cashew apple fibre (*Anacardium occidentale* L.) following simulated gastro-intestinal digestion." Food Chemistry **161**: 142-147.
- de Vries, S., A. M. Pustjens, et al. (2013). "Processing technologies and cell wall degrading enzymes to improve nutritional value of dried distillers grain with solubles for animal feed: an in vitro digestion study." Journal of agricultural and food chemistry **61**(37): 8821-8828.
- Devraj, R., H. D. Williams, et al. (2013). "In vitro assessment of drug-free and fenofibrate-containing lipid formulations using dispersion and digestion testing gives detailed insights into the likely fate of formulations in the intestine." European Journal of Pharmaceutical Sciences **49**(4): 748-760.
- Devraj, R., H. D. Williams, et al. (2013). "In vitro digestion testing of lipid-based delivery systems: calcium ions combine with fatty acids liberated from triglyceride rich lipid solutions to form soaps and reduce the solubilization capacity of colloidal digestion products." International journal of pharmaceutics **441**(1): 323-333.
- Dhuique-Mayer, C., P. Borel, et al. (2007). "β-Cryptoxanthin from citrus juices: assessment of bioaccessibility using an in vitro digestion/Caco-2 cell culture model." British Journal of Nutrition **97**(05): 883-890.
- Dinnella, C., P. Minichino, et al. (2007). "Bioaccessibility and antioxidant activity stability of phenolic compounds from extra-virgin olive oils during in vitro digestion." Journal of agricultural and food chemistry **55**(21): 8423-8429.
- Dona, A. C., G. Pages, et al. (2009). "Kinetics of in vitro digestion of starches monitored by time-resolved 1H nuclear magnetic resonance." Biomacromolecules **10**(3): 638-644.
- Donhowe, E. G. and F. Kong (2014). "Beta-carotene: digestion, microencapsulation, and in vitro bioavailability." Food and Bioprocess Technology **7**(2): 338-354.
- Dupont, D., G. Mandalari, et al. (2010). "Comparative resistance of food proteins to adult and infant in vitro digestion models." Molecular nutrition & food research **54**(6): 767-780.
- Dust, J. M., A. M. Gajda, et al. (2004). "Extrusion conditions affect chemical composition and in vitro digestion of select food ingredients." Journal of agricultural and food chemistry **52**(10): 2989-2996.
- Dziedzic, K., D. Górecka, et al. (2015). "Binding of bile acids by pastry products containing bioactive substances during in vitro digestion." Food & function **6**(3): 1011-1020.
- El, S., S. Karakaya, et al. (2015). "In vitro Digestibility of Goat Milk Kefir with New Standardised Static Digestion Method (INFOGEST Cost Action) and Bioactivities of the Resultant Peptides." Food & function.

- Elgharbi, F., A. Hmida-Sayari, et al. (2015). "Expression of an *Aspergillus niger* xylanase in yeast: Application in breadmaking and in vitro digestion." International journal of biological macromolecules **79**: 103-109.
- Escudero, E., L. Mora, et al. (2014). "Stability of ACE inhibitory ham peptides against heat treatment and in vitro digestion." Food Chemistry **161**: 305-311.
- Escudero, E., M. A. n. Sentandreu, et al. (2010). "Characterization of peptides released by in vitro digestion of pork meat." Journal of agricultural and food chemistry **58**(8): 5160-5165.
- Escudero, L. B., C. M. Fusari, et al. (2014). "Stability of Iron–Quercetin Complexes in Synthetic Wine under In Vitro Digestion Conditions." Journal of food science **79**(10): C1933-C1938.
- Faber, T. A., L. Bauer, et al. (2011). "In vitro digestion and fermentation characteristics of temulose molasses, a coproduct of fiberboard production, and select temulose fractions using canine fecal inoculum." Journal of agricultural and food chemistry **59**(5): 1847-1853.
- Faller, A. L. K., E. Fialho, et al. (2012). "Cellular antioxidant activity of Feijoadá whole meal coupled with an in vitro digestion." Journal of agricultural and food chemistry **60**(19): 4826-4832.
- Fatouros, D. G., B. Bergenstahl, et al. (2007). "Morphological observations on a lipid-based drug delivery system during in vitro digestion." European Journal of Pharmaceutical Sciences **31**(2): 85-94.
- Fay, J., K.-J. Cheng, et al. (1980). "In vitro digestion of bloat-safe and bloat-causing legumes by rumen microorganisms: Gas and foam production." Journal of Dairy Science **63**(8): 1273-1281.
- Faye, T., A. Tamburello, et al. (2012). "Survival of lactic acid bacteria from fermented milks in an in vitro digestion model exploiting sequential incubation in human gastric and duodenum juice." Journal of Dairy Science **95**(2): 558-566.
- Fernandez, S., V. Jannin, et al. (2013). "In vitro digestion of the self-emulsifying lipid excipient Labrasol® by gastrointestinal lipases and influence of its colloidal structure on lipolysis rate." Pharmaceutical research **30**(12): 3077-3087.
- Ferranti, P., C. Nitride, et al. (2014). "In vitro digestion of Bresaola proteins and release of potential bioactive peptides." Food Research International **63**: 157-169.
- Ferruzzi, M. G., M. L. Failla, et al. (2001). "Assessment of degradation and intestinal cell uptake of carotenoids and chlorophyll derivatives from spinach puree using an in vitro digestion and Caco-2 human cell model." Journal of agricultural and food chemistry **49**(4): 2082-2089.
- Flores, F. P., R. K. Singh, et al. (2014). "Total phenolics content and antioxidant capacities of microencapsulated blueberry anthocyanins during in vitro digestion." Food Chemistry **153**: 272-278.
- Foschia, M., D. Peressini, et al. (2015). "Synergistic effect of different dietary fibres in pasta on in vitro starch digestion?" Food Chemistry **172**: 245-250.
- Frontela-Saseta, C., R. López-Nicolás, et al. (2013). "Anti-inflammatory properties of fruit juices enriched with pine bark extract in an in vitro model of inflamed human intestinal epithelium: The effect of gastrointestinal digestion." Food and chemical toxicology **53**: 94-99.

- Fu, J. and Y. Cui (2013). "In vitro digestion/Caco-2 cell model to estimate cadmium and lead bioaccessibility/bioavailability in two vegetables: The influence of cooking and additives." Food and chemical toxicology **59**: 215-221.
- Gallegos Tintoré, S., C. Torres Fuentes, et al. (2015). "Antioxidant and Chelating Activity of Nontoxic *Jatropha curcas* L. Protein Hydrolysates Produced by In Vitro Digestion Using Pepsin and Pancreatin." Journal of Chemistry **2015**.
- Gallier, S., H. Tate, et al. (2013). "In vitro gastric and intestinal digestion of a walnut oil body dispersion." Journal of agricultural and food chemistry **61**(2): 410-417.
- Gallier, S., A. Ye, et al. (2012). "Structural changes of bovine milk fat globules during in vitro digestion." Journal of Dairy Science **95**(7): 3579-3592.
- Garbetta, A., I. Capotorto, et al. (2014). "Antioxidant activity induced by main polyphenols present in edible artichoke heads: influence of in vitro gastro-intestinal digestion." Journal of Functional Foods **10**: 456-464.
- Garrett, D. A., M. L. Failla, et al. (1999). "Development of an in vitro digestion method to assess carotenoid bioavailability from meals." Journal of agricultural and food chemistry **47**(10): 4301-4309.
- Garrett, D. A., M. L. Failla, et al. (2000). "Estimation of carotenoid bioavailability from fresh stir-fried vegetables using an in vitro digestion/Caco-2 cell culture model." The Journal of Nutritional Biochemistry **11**(11): 574-580.
- Giang, T., S. Le Feunteun, et al. (2015). "Dynamic modeling highlights the major impact of droplet coalescence on the in vitro digestion kinetics of a whey protein stabilized submicron emulsion." Food Hydrocolloids **43**: 66-72.
- Gil-Ramírez, A., A. Ruiz-Rodríguez, et al. (2014). "Effect of ergosterol-enriched extracts obtained from *Agaricus bisporus* on cholesterol absorption using an in vitro digestion model." Journal of Functional Foods **11**: 589-597.
- Glahn, R. P., Z. Cheng, et al. (2002). "Comparison of iron bioavailability from 15 rice genotypes: studies using an in vitro digestion/Caco-2 cell culture model." Journal of agricultural and food chemistry **50**(12): 3586-3591.
- Glahn, R. P., C. Lai, et al. (1998). "Decreased citrate improves iron availability from infant formula: application of an in vitro digestion/Caco-2 cell culture model." The Journal of nutrition **128**(2): 257-264.
- Glahn, R. P., O. A. Lee, et al. (1998). "Caco-2 cell ferritin formation predicts nonradiolabeled food iron availability in an in vitro digestion/Caco-2 cell culture model." The Journal of nutrition **128**(9): 1555-1561.
- Glahn, R. P., M. Rassier, et al. (2000). "A comparison of iron availability from commercial iron preparations using an in vitro digestion/Caco-2 cell culture model." The Journal of Nutritional Biochemistry **11**(2): 62-68.
- Glahn, R. P., G. M. Wortley, et al. (2002). "Inhibition of iron uptake by phytic acid, tannic acid, and ZnCl<sub>2</sub>: studies using an in vitro digestion/Caco-2 cell model." Journal of agricultural and food chemistry **50**(2): 390-395.
- Goicoechea, E. n., K. Van Twillert, et al. (2008). "Use of an in vitro digestion model to study the bioaccessibility of 4-hydroxy-2-nonenal and related aldehydes present in oxidized oils rich in omega-6 acyl groups." Journal of agricultural and food chemistry **56**(18): 8475-8483.

- Gómez Sampedro, L. J. and J. E. Zapata Montoya (2014). "Effects of hydrolysis and digestion in vitro on the activity of bovine plasma hydrolysates as inhibitors of the angiotensin I converting enzyme." Brazilian Archives of Biology and Technology **57**(3): 386-393.
- GOTOH, M., T. MAKI, et al. (1987). "REPRODUCIBLE HIGH YIELD OF RAT ISLETS BY STATIONARY IN VITRO DIGESTION FOLLOWING PANCREATIC DUCTAL OR PORTAL VENOUS COLLAGENASE INJECTION1." Transplantation **43**(5): 725-730.
- Gouseti, O., M. Jaime-Fonseca, et al. (2014). "Hydrocolloids in human digestion: Dynamic in-vitro assessment of the effect of food formulation on mass transfer." Food Hydrocolloids **42**: 378-385.
- Guimaraes, V., M.-F. Drumare, et al. (2010). "In vitro digestion of Cry1Ab proteins and analysis of the impact on their immunoreactivity." Journal of agricultural and food chemistry **58**(5): 3222-3231.
- Gumienna, M., M. Lasik, et al. (2011). "Bioconversion of grape and chokeberry wine polyphenols during simulated gastrointestinal in vitro digestion." International journal of food sciences and nutrition **62**(3): 226-233.
- Gunter, S., T. Springer, et al. (2014). "Effect of processing method on in sacco ruminal degradability of organic matter and nitrogen from canola seeds and in vitro intestinal nitrogen digestion of the in sacco residue." Animal Production Science **54**(8): 1030-1038.
- Guo, L., P. A. Harnedy, et al. (2015). "In vitro assessment of the multifunctional bioactive potential of Alaska pollock skin collagen following simulated gastrointestinal digestion." Journal of the science of food and agriculture **95**(7): 1514-1520.
- Guo, Q., A. Ye, et al. (2015). "Disintegration kinetics of food gels during gastric digestion and its role on gastric emptying: an in vitro analysis." Food & function **6**(3): 756-764.
- Hamzalıoğlu, A. and V. Gökmen (2015). "Investigation of the reactions of acrylamide during in vitro multistep enzymatic digestion of thermally processed foods." Food & function **6**(1): 108-113.
- Haratifar, S., K. A. Meckling, et al. (2014). "Bioefficacy of tea catechins encapsulated in casein micelles tested on a normal mouse cell line (4D/WT) and its cancerous counterpart (D/v-src) before and after in vitro digestion." Food & function **5**(6): 1160-1166.
- Hardacre, A. K., S.-Y. Yap, et al. (2015). "The effect of fibre and gelatinised starch type on amylolysis and apparent viscosity during in vitro digestion at a physiological shear rate." Carbohydrate polymers **123**: 80-88.
- Hassan, T. H. and K. Mäder (2015). "Novel semisolid SNEDDS based on PEG-30-di-(polyhydroxystearate): Progesterone incorporation and in vitro digestion." International journal of pharmaceutics **486**(1): 77-87.
- He, Z., B. Yuan, et al. (2015). "Effect of simulated processing on the antioxidant capacity and in vitro protein digestion of fruit juice-milk beverage model systems." Food Chemistry **175**: 457-464.
- Hedrén, E., V. Diaz, et al. (2002). "Estimation of carotenoid accessibility from carrots determined by an in vitro digestion method." European Journal of Clinical Nutrition **56**(5): 425-430.
- Helal, A., S. Desobry, et al. (2015). "Antioxidant activity and bioaccessibility of phenols-enriched edible casein/caseinate coatings during in vitro digestion." Journal of Dairy Research **82**(01): 56-63.



- Helal, A., D. Tagliacruzchi, et al. (2014). "Bioaccessibility of polyphenols and cinnamaldehyde in cinnamon beverages subjected to in vitro gastro-pancreatic digestion." Journal of Functional Foods **7**: 506-516.
- Henning, S. M., Y. Zhang, et al. (2014). "Variability in the antioxidant activity of dietary supplements from pomegranate, milk thistle, green tea, grape seed, goji, and acai: Effects of in vitro digestion." Journal of agricultural and food chemistry **62**(19): 4313-4321.
- Hermida, L. G., M. Sabés-Xamaní, et al. (2009). "Combined strategies for liposome characterization during in vitro digestion." Journal of liposome research **19**(3): 207-219.
- Hernot, D. C., T. W. Boileau, et al. (2008). "In vitro digestion characteristics of unprocessed and processed whole grains and their components." Journal of agricultural and food chemistry **56**(22): 10721-10726.
- Hollebeeck, S., F. Borlon, et al. (2013). "Development of a standardised human in vitro digestion protocol based on macronutrient digestion using response surface methodology." Food Chemistry **138**(2): 1936-1944.
- Hu, C.-C., L.-Y. Liu, et al. (2012). "Protein enrichment, cellulase production and in vitro digestion improvement of pangolagrass with solid state fermentation." Journal of Microbiology, Immunology and Infection **45**(1): 7-14.
- Hu, Y., Z. Cheng, et al. (2006). "Kaempferol in red and pinto bean seed (*Phaseolus vulgaris* L.) coats inhibits iron bioavailability using an in vitro digestion/human Caco-2 cell model." Journal of agricultural and food chemistry **54**(24): 9254-9261.
- Huang, H., Y. Sun, et al. (2014). "In vitro digestion combined with cellular assay to determine the antioxidant activity in Chinese bayberry (*Myrica rubra* Sieb. et Zucc.) fruits: a comparison with traditional methods." Food Chemistry **146**: 363-370.
- Hur, S.-J., Y.-C. Kim, et al. (2013). "The effects of biopolymer encapsulation on total lipids and cholesterol in egg yolk during in vitro human digestion." International journal of molecular sciences **14**(8): 16333-16347.
- Hur, S., S. Lee, et al. (2013). "Onion extract structural changes during in vitro digestion and its potential antioxidant effect on brain lipids obtained from low-and high-fat-fed mice." Free radical research **47**(12): 1009-1015.
- Hur, S., S. Lee, et al. (2015). "Effect of emulsifiers on microstructural changes and digestion of lipids in instant noodle during in vitro human digestion." LWT-Food Science and Technology **60**(1): 630-636.
- Hur, S., B. Lim, et al. (2009). "Effects of various fiber additions on lipid digestion during in vitro digestion of beef patties." Journal of food science **74**(9): C653-C657.
- Hur, S. J., S. T. Joo, et al. (2011). "Impact of salt and lipid type on in vitro digestion of emulsified lipids." Food Chemistry **126**(4): 1559-1564.
- Hur, S. J., D. H. Kim, et al. (2013). "Effects of biopolymer encapsulation on trans fatty acid digestibility in an in vitro human digestion system." Food & function **4**(12): 1827-1834.
- Hur, S. J., S. Y. Lee, et al. (2015). "Effect of biopolymer encapsulation on the digestibility of lipid and cholesterol oxidation products in beef during in vitro human digestion." Food Chemistry **166**: 254-260.
- Hur, S. J., B. O. Lim, et al. (2011). "In vitro human digestion models for food applications." Food Chemistry **125**(1): 1-12.

- Jacques, H., Y. Deshaies, et al. (1986). "Relationship between dietary proteins, their in vitro digestion products, and serum cholesterol in rats." *Atherosclerosis* **61**(2): 89-98.
- Jakobsson, I., T. Lindberg, et al. (1982). "In vitro digestion of cow's milk proteins by duodenal juice from infants with various gastrointestinal disorders." *Journal of pediatric gastroenterology and nutrition* **1**(2): 183-192.
- Jakubczyk, A., M. Karaś, et al. (2013). "The impact of fermentation and in vitro digestion on formation angiotensin converting enzyme (ACE) inhibitory peptides from pea proteins." *Food Chemistry* **141**(4): 3774-3780.
- Jayawardena, N., M. I. Watawana, et al. (2015). "Evaluation of the Total Antioxidant Capacity, Polyphenol Contents and Starch Hydrolase Inhibitory Activity of Ten Edible Plants in an In vitro Model of Digestion." *Plant Foods for Human Nutrition* **70**(1): 71-76.
- Jenkins, D., M. J. Thorne, et al. (1987). "The effect of starch-protein interaction in wheat on the glycemic response and rate of in vitro digestion." *The American journal of clinical nutrition* **45**(5): 946-951.
- Jensen-Jarolim, E. and E. Untersmayr (2006). "Food safety: in vitro digestion tests are non-predictive for allergenic potential of food in stomach insufficiency." *Immunology letters* **102**(1): 118-119.
- Jensen, I.-J., H. Abrahamsen, et al. (2009). "Changes in antioxidative capacity of saithe (*Pollachius virens*) and shrimp (*Pandalus borealis*) during in vitro digestion." *Journal of agricultural and food chemistry* **57**(22): 10928-10932.
- Jensen, I.-J., J. Dort, et al. (2014). "Proximate composition, antihypertensive and antioxidative properties of the semimembranosus muscle from pork and beef after cooking and in vitro digestion." *Meat science* **96**(2): 916-921.
- Ji, L., Y. ZHANG, et al. (2012). "Assessment of iron bioavailability in ten kinds of Chinese wheat flours using an in vitro digestion/Caco-2 cell model." *Biomedical and Environmental Sciences* **25**(5): 502-508.
- Jiang, H., Y. Zhang, et al. (2015). "Digestibility and changes to structural characteristics of green banana starch during in vitro digestion." *Food Hydrocolloids* **49**: 192-199.
- Jiao, J., P. Wang, et al. (2014). "In vitro evaluation on neutral detergent fiber and cellulose digestion by post-ruminal microorganisms in goats." *Journal of the science of food and agriculture* **94**(9): 1745-1752.
- Jiménez-Saiz, R., J. Belloque, et al. (2011). "Human immunoglobulin E (IgE) binding to heated and glycated ovalbumin and ovomucoid before and after in vitro digestion." *Journal of agricultural and food chemistry* **59**(18): 10044-10051.
- Jiménez-Saiz, R., C. Pineda-Vadillo, et al. (2012). "Human IgE binding and in vitro digestion of S-OVA." *Food Chemistry* **135**(3): 1842-1847.
- Jin, F., R. Welch, et al. (2006). "Moving toward a more physiological model: application of mucin to refine the in vitro digestion/Caco-2 cell culture system." *Journal of agricultural and food chemistry* **54**(23): 8962-8967.
- Kaimainen, M., S. Marze, et al. (2015). "Encapsulation of betalain into w/o/w double emulsion and release during in vitro intestinal lipid digestion." *LWT-Food Science and Technology* **60**(2): 899-904.
- Kamiloglu, S., A. A. Pasli, et al. (2015). "Colour retention, anthocyanin stability and antioxidant capacity in black carrot (*Daucus carota*) jams and marmalades: Effect of

processing, storage conditions and in vitro gastrointestinal digestion." Journal of Functional Foods **13**: 1-10.

Kaukonen, A. M., B. J. Boyd, et al. (2004). "Drug solubilization behavior during in vitro digestion of simple triglyceride lipid solution formulations." Pharmaceutical research **21**(2): 245-253.

Kaur, L., S. M. Rutherford, et al. (2010). "Actinidin enhances protein digestion in the small intestine as assessed using an in vitro digestion model." Journal of agricultural and food chemistry **58**(8): 5074-5080.

Kenmogne-Domgua, H. B., A. Meynier, et al. (2012). "Gastric conditions control both the evolution of the organization of protein-stabilized emulsions and the kinetic of lipolysis during in vitro digestion." Food & function **3**(12): 1302-1309.

Kenmogne-Domgua, H. B., S. Moisan, et al. (2014). "The initial characteristics of marine oil emulsions and the composition of the media inflect lipid oxidation during in vitro gastrointestinal digestion." Food Chemistry **152**: 146-154.

Kiebooms, J. A., J. Wauters, et al. (2014). "Identification and characterisation of thiouracil forming bacteria upon porcine in vitro digestion of Brassicaceae feed." Applied and environmental microbiology: AEM. 02370-02314.

Kiebooms, J. A., J. Wauters, et al. (2014). "Thiouracil-Forming Bacteria Identified and Characterized upon Porcine In Vitro Digestion of Brassicaceae Feed." Applied and environmental microbiology **80**(23): 7433-7442.

Kim, H. J. and P. J. White (2012). "In vitro digestion rate and estimated glycemic index of oat flours from typical and high  $\beta$ -glucan oat lines." Journal of agricultural and food chemistry **60**(20): 5237-5242.

Kosińska-Cagnazzo, A., S. Diering, et al. (2015). "Identification of bioaccessible and uptaken phenolic compounds from strawberry fruits in in vitro digestion/Caco-2 absorption model." Food Chemistry **170**: 288-294.

Krishnakumari, S. and B. Thayumanavan (1995). "Content of starch and sugars and in vitro digestion of starch by  $\alpha$ -amylase in five minor millets." Plant Foods for Human Nutrition **48**(4): 327-333.

Kyriakoudi, A., M. Z. Tsimidou, et al. (2013). "Changes in total and individual crocetin esters upon in vitro gastrointestinal digestion of saffron aqueous extracts." Journal of agricultural and food chemistry **61**(22): 5318-5327.

Lai, P., A. Okazawa, et al. (2012). "Gallic acid oxidizes Met residues in peptides released from bovine  $\beta$ -lactoglobulin by in vitro digestion." Journal of bioscience and bioengineering **114**(3): 297-305.

Lam, M., C. Scaman, et al. (2008). "Retention of phenylalanine ammonia-lyase activity in wheat seedlings during storage and in vitro digestion." Journal of agricultural and food chemistry **56**(23): 11407-11412.

Lang, G.-h., Y. Kagiya, et al. (2015). "Multiplex comparison of the digestibility of allergenic and non-allergenic proteins in rice grains by in vitro digestion." Food Chemistry **168**: 606-614.

Laparra, J., D. Velez, et al. (2003). "Estimation of arsenic bioaccessibility in edible seaweed by an in vitro digestion method." Journal of agricultural and food chemistry **51**(20): 6080-6085.

- Larsson, K., L. Cavonius, et al. (2012). "Oxidation of cod liver oil during gastrointestinal in vitro digestion." Journal of agricultural and food chemistry **60**(30): 7556-7564.
- Le Maux, S., A. Brodkorb, et al. (2013). " $\beta$ -Lactoglobulin-linoleate complexes: In vitro digestion and the role of protein in fatty acid uptake." Journal of Dairy Science **96**(7): 4258-4268.
- Lease, J. (1967). "Availability to the Chick of Zinc· Phytate Complexes Isolated from Oil Seed Meals by an in vitro Digestion Method." The Journal of nutrition **93**(4): 523-532.
- Lechevalier, V., N. Musikaphun, et al. (2015). "Effects of dry heating on the progression of in vitro digestion of egg white proteins: contribution of multifactorial data analysis." Food & function **6**(5): 1578-1590.
- Lee, H. R., S. D. Cho, et al. (2014). "Digestive recovery of sulfur-methyl-l-methionine and its bioaccessibility in Kimchi cabbages using a simulated in vitro digestion model system." Journal of the science of food and agriculture **94**(1): 109-112.
- Li, S. X., L. x. Lin, et al. (2010). "Speciation analysis, bioavailability and risk assessment of trace metals in herbal decoctions using a combined technique of in vitro digestion and biomembrane filtration as sample pretreatment method." Phytochemical Analysis **21**(6): 590-596.
- Lichtenstein, D., J. Ebmeyer, et al. "Impact of food components during in vitro digestion of silver nanoparticles on cellular uptake and cytotoxicity in intestinal cells."
- Lin, L., S. Li, et al. (2014). "[Application of in vitro bionic digestion and biomembrane extraction for metal speciation analysis, bioavailability and risk assessment in lianhua qingwen capsule]." Zhongguo Zhong yao za zhi= Zhongguo zhongyao zazhi= China journal of Chinese materia medica **39**(12): 2330-2335.
- Lin, X., X. Hu, et al. (2012). "[Development of an in vitro digestion model for assessing the bioaccessibility of aflatoxin B group in foods]." Zhonghua yu fang yi xue za zhi [Chinese journal of preventive medicine] **46**(10): 937-941.
- Lindberg, T., S. Engberg, et al. (1998). "In vitro digestion of proteins in human milk fortifiers and in preterm formula." Journal of pediatric gastroenterology and nutrition **27**(1): 30-36.
- Lisson, M., G. Lochnit, et al. (2013). "Genetic variants of bovine  $\beta$ -and  $\kappa$ -casein result in different immunoglobulin E-binding epitopes after in vitro gastrointestinal digestion." Journal of Dairy Science **96**(9): 5532-5543.
- Lisson, M., G. Lochnit, et al. (2014). "In vitro gastrointestinal digestion of bovine  $\alpha$  S1-and  $\alpha$  S2-casein variants gives rise to different IgE-binding epitopes." International Dairy Journal **34**(1): 47-55.
- Liu, C.-S., R. P. Glahn, et al. (2004). "Assessment of carotenoid bioavailability of whole foods using a Caco-2 cell culture model coupled with an in vitro digestion." Journal of agricultural and food chemistry **52**(13): 4330-4337.
- Liu, W., J. Liu, et al. (2013). "Improved physical and in vitro digestion stability of a polyelectrolyte delivery system based on layer-by-layer self-assembly alginate–chitosan-coated nanoliposomes." Journal of agricultural and food chemistry **61**(17): 4133-4144.
- Liu, W., A. Ye, et al. (2015). "Behaviour of liposomes loaded with bovine serum albumin during in vitro digestion." Food Chemistry **175**: 16-24.

Liu, W., A. Ye, et al. (2013). "Stability during in vitro digestion of lactoferrin-loaded liposomes prepared from milk fat globule membrane-derived phospholipids." Journal of Dairy Science **96**(4): 2061-2070.

Liu, Y., F. Lei, et al. (2014). "Effects of milk proteins on release properties and particle morphology of  $\beta$ -carotene emulsions during in vitro digestion." Food & function **5**(11): 2940-2947.

Logan, K., A. J. Wright, et al. (2015). "Correlating the structure and in vitro digestion viscosities of different pectin fibers to in vivo human satiety." Food & function **6**(1): 62-70.

López-Nicolás, R., C. A. González-Bermúdez, et al. (2014). "Influence of in vitro gastrointestinal digestion of fruit juices enriched with pine bark extract on intestinal microflora." Food Chemistry **157**: 14-19.

Lopez-Rubio, A., B. M. Flanagan, et al. (2008). "Molecular rearrangement of starch during in vitro digestion: toward a better understanding of enzyme resistant starch formation in processed starches." Biomacromolecules **9**(7): 1951-1958.

Lueamsaisuk, C., R. Lentle, et al. (2015). "The effect of lactoferrin on physical changes in phospholipid stabilised emulsions during neonatal in vitro gastric digestion: Does synergism of pepsin and lipase promote lipolysis in protein-stabilised emulsions?" Food Hydrocolloids **43**: 785-793.

Ma, Y., M. Zhou, et al. (2014). "Changes of heat-treated soymilks in bioactive compounds and their antioxidant activities under in vitro gastrointestinal digestion." European Food Research and Technology **239**(4): 637-652.

Mahler, G. J., M. L. Shuler, et al. (2009). "Characterization of Caco-2 and HT29-MTX cocultures in an in vitro digestion/cell culture model used to predict iron bioavailability." The Journal of Nutritional Biochemistry **20**(7): 494-502.

Mamone, G., C. Nitride, et al. (2015). "Tracking the Fate of Pasta (T. Durum Semolina) Immunogenic Proteins by in Vitro Simulated Digestion." Journal of agricultural and food chemistry **63**(10): 2660-2667.

Mandak, E. and L. Nyström (2012). "The effect of in vitro digestion on steryl ferulates from rice (*Oryza sativa* L.) and other grains." Journal of agricultural and food chemistry **60**(24): 6123-6130.

Mandalari, G., M. M.-L. Grundy, et al. (2014). "The effects of processing and mastication on almond lipid bioaccessibility using novel methods of in vitro digestion modelling and microstructural analysis." British Journal of Nutrition **112**(09): 1521-1529.

Marchese, A., E. Coppo, et al. (2014). "Influence of in vitro simulated gastroduodenal digestion on the antibacterial activity, metabolic profiling and polyphenols content of green tea (*Camellia sinensis*)." Food Research International **63**: 182-191.

Marcolini, E., E. Babini, et al. (2015). "Bioaccessibility of the bioactive peptide carnosine during in vitro digestion of cured beef meat." Journal of agricultural and food chemistry.

Marmon, S. K. and I. Undeland (2013). "Effect of alkaline pH-shift processing on in vitro gastrointestinal digestion of herring (*Clupea harengus*) fillets." Food Chemistry **138**(1): 214-219.

Martin, D., M. I. Moran-Valero, et al. (2014). "Phosphatidyl Derivative of Hydroxytyrosol. In Vitro Intestinal Digestion, Bioaccessibility, and Its Effect on Antioxidant Activity." Journal of agricultural and food chemistry **62**(40): 9751-9759.

- Martin, D., M. I. Moran-Valero, et al. (2014). "Comparative in vitro intestinal digestion of 1, 3-diglyceride and 1-monoglyceride rich oils and their mixtures." Food Research International **64**: 603-609.
- Martínez, J., G. Nieto, et al. (2014). "Influence of in vitro gastrointestinal digestion and/or grape seed extract addition on antioxidant capacity of meat emulsions." LWT-Food Science and Technology **59**(2): 834-840.
- Martos, G., R. López-Fandiño, et al. (2013). "Immunoreactivity of hen egg allergens: influence on in vitro gastrointestinal digestion of the presence of other egg white proteins and of egg yolk." Food Chemistry **136**(2): 775-781.
- Marze, S., C. Gaillard, et al. (2015). "In vitro digestion of emulsions: high spatiotemporal resolution using synchrotron SAXS." Soft Matter **11**(26): 5365-5373.
- Marze, S., A. Meynier, et al. (2013). "In vitro digestion of fish oils rich in n-3 polyunsaturated fatty acids studied in emulsion and at the oil–water interface." Food & function **4**(2): 231-239.
- Matar, C., J. Amiot, et al. (1996). "The effect of milk fermentation by *Lactobacillus helveticus* on the release of peptides during in vitro digestion." Journal of Dairy Science **79**(6): 971-979.
- Matsuda, Y., N. Sumida, et al. (2003). "Zinc in oysters (*Crassostrea gigas*): Chemical characteristics and action during in vitro digestion." Journal of nutritional science and vitaminology **49**(6): 405-408.
- Mattison, C. P., C. C. Grimm, et al. (2014). "In vitro digestion of soluble cashew proteins and characterization of surviving IgE-reactive peptides." Molecular nutrition & food research **58**(4): 884-893.
- McCarthy, A. L., Y. C. O'Callaghan, et al. (2015). "A study of the ability of bioactive extracts from brewers' spent grain to enhance the antioxidant and immunomodulatory potential of food formulations following in vitro digestion." International journal of food sciences and nutrition **66**(2): 230-235.
- McClements, D. J. and Y. Li (2010). "Review of in vitro digestion models for rapid screening of emulsion-based systems." Food & function **1**(1): 32-59.
- Ménard, O., T. Cattenoz, et al. (2014). "Validation of a new in vitro dynamic system to simulate infant digestion." Food Chemistry **145**: 1039-1045.
- Merkel, S., B. Dib, et al. (2012). "Degradation and epimerization of ergot alkaloids after baking and in vitro digestion." Analytical and bioanalytical chemistry **404**(8): 2489-2497.
- Minekus, M., M. Alming, et al. (2014). "A standardised static in vitro digestion method suitable for food—an international consensus." Food & function **5**(6): 1113-1124.
- Miranda, L., H. Deußer, et al. (2013). "The impact of in vitro digestion on bioaccessibility of polyphenols from potatoes and sweet potatoes and their influence on iron absorption by human intestinal cells." Food & function **4**(11): 1595-1601.
- Mishra, S. and J. Monro (2012). "Wholeness and primary and secondary food structure effects on in vitro digestion patterns determine nutritionally distinct carbohydrate fractions in cereal foods." Food Chemistry **135**(3): 1968-1974.
- Mo, H., Y. Zhu, et al. (2012). "In vitro digestion enhances anti-adhesion effect of tempe and tofu against *Escherichia coli*." Letters in applied microbiology **54**(2): 166-168.

- Monaci, L., A. Garbetta, et al. (2015). "Assessment of toxic potential of mycotoxin contaminated bread during in vitro human digestion on human B lymphoid cell line." Toxicology letters **232**(1): 106-112.
- Moreno, F. J., A. R. Mackie, et al. (2005). "Phospholipid interactions protect the milk allergen  $\alpha$ -lactalbumin from proteolysis during in vitro digestion." Journal of agricultural and food chemistry **53**(25): 9810-9816.
- Naim, F., D. Leblanc, et al. (2006). "Shiga toxin production by sausage-borne Escherichia coli O157: H7 in response to a post-processing in vitro digestion challenge." Food microbiology **23**(3): 231-240.
- Naim, F., S. Messier, et al. (2004). "Postprocessing in vitro digestion challenge to evaluate survival of Escherichia coli O157: H7 in fermented dry sausages." Applied and environmental microbiology **70**(11): 6637-6642.
- Nalin, T., K. Venema, et al. (2014). "In vitro digestion of starches in a dynamic gastrointestinal model: an innovative study to optimize dietary management of patients with hepatic glycogen storage diseases." Journal of inherited metabolic disease **38**(3): 529-536.
- Nanon, A., W. Suksombat, et al. (2014). "Effects of essential oils supplementation on in vitro and in situ feed digestion in beef cattle." Animal Feed Science and Technology **196**: 50-59.
- Nderitu, A. M., L. Dykes, et al. (2013). "Phenolic composition and inhibitory effect against oxidative DNA damage of cooked cowpeas as affected by simulated in vitro gastrointestinal digestion." Food Chemistry **141**(3): 1763-1771.
- Nehir El, S., S. Karakaya, et al. (2015). "In vitro digestibility of goat milk and kefir with a new standardised static digestion method (INFOGEST cost action) and bioactivities of the resultant peptides." Food & function **6**(7): 2322-2330.
- Neilson, A. P., A. S. Hopf, et al. (2007). "Catechin degradation with concurrent formation of homo- and heterocatechin dimers during in vitro digestion." Journal of agricultural and food chemistry **55**(22): 8941-8949.
- Nguyen, G. T., M. J. Gidley, et al. (2015). "Dependence of in-vitro starch and protein digestions on particle size of field peas (Pisum sativum L.)." LWT-Food Science and Technology **63**(1): 541-549.
- Nik, A. M., M. Corredig, et al. (2011). "Release of lipophilic molecules during in vitro digestion of soy protein-stabilized emulsions." Molecular nutrition & food research **55**(S2): S278-S289.
- Nik, A. M., A. J. Wright, et al. (2011). "Impact of interfacial composition on emulsion digestion and rate of lipid hydrolysis using different in vitro digestion models." Colloids and Surfaces B: Biointerfaces **83**(2): 321-330.
- Noack, J., D. Timm, et al. (2013). "Fermentation Profiles of Wheat Dextrin, Inulin and Partially Hydrolyzed Guar Gum Using an in Vitro Digestion Pretreatment and in Vitro Batch Fermentation System Model." Nutrients **5**(5): 1500-1510.
- Nyemb, K., C. Guérin-Dubiard, et al. (2014). "The extent of ovalbumin in vitro digestion and the nature of generated peptides are modulated by the morphology of protein aggregates." Food Chemistry **157**: 429-438.
- Nyemb, K., J. Jardin, et al. (2014). "Investigating the impact of ovalbumin aggregate morphology on in vitro ovalbumin digestion using label-free quantitative peptidomics and multivariate data analysis." Food Research International **63**: 192-202.

- O'Sullivan, L., M. A. Jiwan, et al. (2010). "Bioaccessibility, uptake, and transport of carotenoids from peppers (*Capsicum* spp.) using the coupled in vitro digestion and human intestinal Caco-2 cell model." Journal of agricultural and food chemistry **58**(9): 5374-5379.
- Oliveira, A. and M. Pintado (2015). "Stability of polyphenols and carotenoids in strawberry and peach yoghurt throughout in vitro gastrointestinal digestion." Food & function **6**(5): 1611-1619.
- Oomen, A., C. Rompelberg, et al. (2003). "Development of an in vitro digestion model for estimating the bioaccessibility of soil contaminants." Archives of Environmental Contamination and toxicology **44**(3): 0281-0287.
- Oomen, A., C. Rompelberg, et al. (2004). "Effect of bile type on the bioaccessibility of soil contaminants in an in vitro digestion model." Archives of Environmental Contamination and toxicology **46**(2): 183-188.
- Oomen, A. G., A. Hack, et al. (2002). "Comparison of five in vitro digestion models to study the bioaccessibility of soil contaminants." Environmental science & technology **36**(15): 3326-3334.
- Ortega, N., J. Reguant, et al. (2009). "Effect of fat content on the digestibility and bioaccessibility of cocoa polyphenol by an in vitro digestion model." Journal of agricultural and food chemistry **57**(13): 5743-5749.
- Overduin, J., L. Guérin-Deremaux, et al. (2015). "NUTRALYS® pea protein: characterization of in vitro gastric digestion and in vivo gastrointestinal peptide responses relevant to satiety." Food & nutrition research **59**.
- Pachón, H., R. J. Stoltzfus, et al. (2008). "Chicken thigh, chicken liver, and iron-fortified wheat flour increase iron uptake in an in vitro digestion/Caco-2 cell model." Nutrition Research **28**(12): 851-858.
- Pachón, H., R. J. Stoltzfus, et al. (2009). "Homogenization, lyophilization or acid-extraction of meat products improves iron uptake from cereal–meat product combinations in an in vitro digestion/Caco-2 cell model." British Journal of Nutrition **101**(06): 816-821.
- Palmero, P., A. Panozzo, et al. (2014). "Lycopene and  $\beta$ -carotene transfer to oil and micellar phases during in vitro digestion of tomato and red carrot based-fractions." Food Research International **64**: 831-838.
- Papetti, A., D. Mascherpa, et al. (2014). "Free  $\alpha$ -dicarbonyl compounds in coffee, barley coffee and soy sauce and effects of in vitro digestion." Food Chemistry **164**: 259-265.
- Pasini, G., B. Simonato, et al. (2001). "Modifications of wheat flour proteins during in vitro digestion of bread dough, crumb, and crust: an electrophoretic and immunological study." Journal of agricultural and food chemistry **49**(5): 2254-2261.
- Pavan, V., R. A. S. Sancho, et al. (2014). "The effect of in vitro digestion on the antioxidant activity of fruit extracts (*Carica papaya*, *Artocarpus heterophyllus* and *Annona marcgravii*)." LWT-Food Science and Technology **59**(2): 1247-1251.
- Pelfrêne, A., C. Waterlot, et al. (2011). "In vitro digestion and DGT techniques for estimating cadmium and lead bioavailability in contaminated soils: Influence of gastric juice pH." Science of the total environment **409**(23): 5076-5085.
- Pelfrêne, A., C. Waterlot, et al. (2015). "Use of an in vitro digestion method to estimate human bioaccessibility of Cd in vegetables grown in smelter-impacted soils: the influence of cooking." Environmental geochemistry and health: 1-12.



- Peram, M. R., S. M. Loveday, et al. (2013). "In vitro gastric digestion of heat-induced aggregates of  $\beta$ -lactoglobulin." Journal of Dairy Science **96**(1): 63-74.
- Peters, R., E. Kramer, et al. (2012). "Presence of nano-sized silica during in vitro digestion of foods containing silica as a food additive." ACS nano **6**(3): 2441-2451.
- Petrat-Melin, B., P. Andersen, et al. (2015). "In vitro digestion of purified  $\beta$ -casein variants A 1, A 2, B, and I: Effects on antioxidant and angiotensin-converting enzyme inhibitory capacity." Journal of Dairy Science **98**(1): 15-26.
- Picariello, G., G. Iacomino, et al. (2013). "Transport across Caco-2 monolayers of peptides arising from in vitro digestion of bovine milk proteins." Food Chemistry **139**(1): 203-212.
- Pinto, M. S., J. Léonil, et al. (2014). "Heating and glycation of  $\beta$ -lactoglobulin and  $\beta$ -casein: Aggregation and in vitro digestion." Food Research International **55**: 70-76.
- Plundrich, N. J., B. L. White, et al. (2015). "Stability and immunogenicity of hypoallergenic peanut protein-polyphenol complexes during in vitro pepsin digestion." Food & function **6**(7): 2145-2154.
- Plundrich, N. J., B. L. White, et al. (2015). "Stability and immunogenicity of hypoallergenic peanut protein–polyphenol complexes during in vitro pepsin digestion." Food & function.
- Puyfoulhoux, G., J.-M. Rouanet, et al. (2001). "Iron availability from iron-fortified spirulina by an in vitro digestion/Caco-2 cell culture model." Journal of agricultural and food chemistry **49**(3): 1625-1629.
- Pynaert, I., C. Armah, et al. (2006). "Iron solubility compared with in vitro digestion–Caco-2 cell culture method for the assessment of iron bioavailability in a processed and unprocessed complementary food for Tanzanian infants (6–12 months)." British Journal of Nutrition **95**(04): 721-726.
- Qureshi, T., G. Vegarud, et al. (2013). "Angiotensin I-converting enzyme-inhibitory activity of the Norwegian autochthonous cheeses Gamalost and Norvegia after in vitro human gastrointestinal digestion." Journal of Dairy Science **96**(2): 838-853.
- Raes, K., E. H. Doolaeghe, et al. (2015). "Effect of carnosic acid, quercetin and  $\alpha$ -tocopherol on lipid and protein oxidation in an in vitro simulated gastric digestion model." International journal of food sciences and nutrition **66**(2): 216-221.
- Rafiquzzaman, S., E.-Y. Kim, et al. (2013). "Antioxidant activity of glycoprotein purified from *Undaria pinnatifida* measured by an in vitro digestion model." International journal of biological macromolecules **62**: 265-272.
- Rajamohamed, S. H., A. N. Aryee, et al. (2013). "In vitro gastrointestinal digestion of glabrous canaryseed proteins as affected by variety and thermal treatment." Plant Foods for Human Nutrition **68**(3): 306-312.
- Ramírez, C., C. Millon, et al. (2015). "Study of effect of sodium alginate on potato starch digestibility during in vitro digestion." Food Hydrocolloids **44**: 328-332.
- Rao, S., J. Sun, et al. (2012). "ACE inhibitory peptides and antioxidant peptides derived from in vitro digestion hydrolysate of hen egg white lysozyme." Food Chemistry **135**(3): 1245-1252.
- Rashidinejad, A., E. Birch, et al. (2015). "Total phenolic content and antioxidant properties of hard low-fat cheese fortified with catechin as affected by in vitro gastrointestinal digestion." LWT-Food Science and Technology **62**(1): 393-399.

- Rinaldi, L., S. F. Gauthier, et al. (2014). "In vitro gastrointestinal digestion of liquid and semi-liquid dairy matrixes." LWT-Food Science and Technology **57**(1): 99-105.
- Rodríguez-Roque, M. J., M. A. Rojas-Graü, et al. (2013). "Soy milk phenolic compounds, isoflavones and antioxidant activity as affected by in vitro gastrointestinal digestion." Food Chemistry **136**(1): 206-212.
- Rodríguez-Roque, M. J., M. A. Rojas-Graü, et al. (2013). "Changes in vitamin C, phenolic, and carotenoid profiles throughout in vitro gastrointestinal digestion of a blended fruit juice." Journal of agricultural and food chemistry **61**(8): 1859-1867.
- Roman, M. J., B. J. Burri, et al. (2012). "Release and bioaccessibility of  $\beta$ -carotene from fortified almond butter during in vitro digestion." Journal of agricultural and food chemistry **60**(38): 9659-9666.
- Romano, A., C. Giosafatto, et al. (2015). "Impact of dehulling on the physico-chemical properties and in vitro protein digestion of common beans (*Phaseolus vulgaris* L.)." Food Funct. **6**(4): 1345-1351.
- Rubió, L., A. Macià, et al. (2014). "Effect of the co-occurring olive oil and thyme extracts on the phenolic bioaccessibility and bioavailability assessed by in vitro digestion and cell models." Food Chemistry **149**: 277-284.
- Sabboh-Jourdan, H., F. Valla, et al. (2011). "Organic acid bioavailability from banana and sweet potato using an in vitro digestion and Caco-2 cell model." European journal of nutrition **50**(1): 31-40.
- Sagrati, G., G. Caprioli, et al. (2013). "Determination of soyasaponins I and  $\beta$ g in raw and cooked legumes by solid phase extraction (SPE) coupled to liquid chromatography (LC)–mass spectrometry (MS) and assessment of their bioaccessibility by an in vitro digestion model." Journal of agricultural and food chemistry **61**(8): 1702-1709.
- Scherbel, C., R. Pichner, et al. (2007). "Infectivity of scrapie prion protein (PrP<sup>Sc</sup>) following in vitro digestion with bovine gastrointestinal microbiota." Zoonoses and public health **54**(5): 185-190.
- Seim, G. L., C. I. Ahn, et al. (2013). "Bioavailability of iron in geophagic earths and clay minerals, and their effect on dietary iron absorption using an in vitro digestion/Caco-2 cell model." Food & function **4**(8): 1263-1270.
- Serrano, J., I. Goñi, et al. (2005). "Determination of  $\beta$ -carotene and lutein available from green leafy vegetables by an in vitro digestion and colonic fermentation method." Journal of agricultural and food chemistry **53**(8): 2936-2940.
- Sessa, M., R. Tsao, et al. (2011). "Evaluation of the stability and antioxidant activity of nanoencapsulated resveratrol during in vitro digestion." Journal of agricultural and food chemistry **59**(23): 12352-12360.
- Shen, F., F. Niu, et al. (2014). "Interactions between tea polyphenol and two kinds of typical egg white proteins—ovalbumin and lysozyme: Effect on the gastrointestinal digestion of both proteins in vitro." Food Research International **59**: 100-107.
- Shen, Z., C. Apriani, et al. (2011). "Food matrix effects on in vitro digestion of microencapsulated tuna oil powder." Journal of agricultural and food chemistry **59**(15): 8442-8449.
- Silva, F., Y. O'Callaghan, et al. (2013). "Antioxidant capacity of flaxseed products: the effect of in vitro digestion." Plant Foods for Human Nutrition **68**(1): 24-30.

- Simonato, B., G. Pasini, et al. (2001). "Food allergy to wheat products: the effect of bread baking and in vitro digestion on wheat allergenic proteins. A study with bread dough, crumb, and crust." Journal of agricultural and food chemistry **49**(11): 5668-5673.
- Singh, T. K., S. K. Øiseth, et al. (2014). "Influence of heat and shear induced protein aggregation on the in vitro digestion rate of whey proteins." Food & function **5**(11): 2686-2698.
- Siracusa, L., T. Kulisic-Bilusic, et al. (2011). "Phenolic composition and antioxidant activity of aqueous infusions from Capparis spinosa L. and Crithmum maritimum L. before and after submission to a two-step in vitro digestion model." Journal of agricultural and food chemistry **59**(23): 12453-12459.
- Sørensen, A. D. and K. Bukhave (2010). "Iron uptake by Caco-2 cells following in vitro digestion: Effects of heat treatments of pork meat and pH of the digests." Journal of Trace Elements in Medicine and Biology **24**(4): 230-235.
- Souilah, R., D. Djabali, et al. (2014). "In vitro starch digestion in sorghum flour from Algerian cultivars." Food science & nutrition **2**(3): 251-259.
- Spanghero, M., P. Berzaghi, et al. (2010). "Technical note: Precision and accuracy of in vitro digestion of neutral detergent fiber and predicted net energy of lactation content of fibrous feeds." Journal of Dairy Science **93**(10): 4855-4859.
- Stanisavljević, N., J. Samardžić, et al. (2015). "Antioxidant and antiproliferative activity of chokeberry juice phenolics during in vitro simulated digestion in the presence of food matrix." Food Chemistry **175**: 516-522.
- Stelmach, E., P. Pohl, et al. (2014). "Evaluation of the bioaccessability of Ca, Fe, Mg and Mn in ground coffee infusions by in vitro gastrointestinal digestion." Journal of the Brazilian Chemical Society **25**(11): 1993-1999.
- Stillhart, C., G. Imanidis, et al. (2013). "Insights into drug precipitation kinetics during in vitro digestion of a lipid-based drug delivery system using in-line Raman spectroscopy and mathematical modeling." Pharmaceutical research **30**(12): 3114-3130.
- Storcksdieck, S., G. Bonsmann, et al. (2007). "Iron-binding properties, amino acid composition, and structure of muscle tissue peptides from in vitro digestion of different meat sources." Journal of food science **72**(1): S019-S029.
- Stuknytė, M., S. Cattaneo, et al. (2015). "Occurrence and fate of ACE-inhibitor peptides in cheeses and in their digestates following in vitro static gastrointestinal digestion." Food Chemistry **168**: 27-33.
- Stuknytė, M., M. Maggioni, et al. (2015). "Release of wheat gluten exorphins A5 and C5 during in vitro gastrointestinal digestion of bread and pasta and their absorption through an in vitro model of intestinal epithelium." Food Research International **72**: 208-214.
- Suliburska, J., P. Bogdański, et al. (2012). "THE INFLUENCE OF SELECTED CARDIOVASCULAR AND ANTIDIABETIC DRUGS ON PEPSIN ACTIVITY IN VITRO DIGESTION." Acta Pol. Pharm **69**(6): 1049-1053.
- Szterk, A. (2013). "Chemical state of heterocyclic aromatic amines in grilled beef: Evaluation by in vitro digestion model and comparison of alkaline hydrolysis and organic solvent for extraction." Food and chemical toxicology **62**: 653-660.
- TAKENAKA, F. and H. Uchiyama (2001). "Effects of  $\alpha$ -D-glucosylglycerol on the in vitro digestion of disaccharides by rat intestinal enzymes." Bioscience, biotechnology, and biochemistry **65**(7): 1458-1463.

- Tako, E., M. W. Blair, et al. (2011). "Biofortified red mottled beans (*Phaseolus vulgaris* L.) in a maize and bean diet provide more bioavailable iron than standard red mottled beans: Studies in poultry (*Gallus gallus*) and an in vitro digestion/Caco-2 model." Nutr J **10**(113): 10.1186.
- Tako, E. and R. P. Glahn (2010). "White beans provide more bioavailable iron than red beans: studies in poultry (*Gallus gallus*) and an in vitro digestion/Caco-2 model." International journal for vitamin and nutrition research **80**(6): 416.
- Tao, S., D. Zhang, et al. (2010). "Mobility of polycyclic aromatic hydrocarbons in the gastrointestinal tract assessed using an in vitro digestion model with sorption rectification." Environmental science & technology **44**(14): 5608-5612.
- Tashiro, M. and S. Ikegami (1996). "Changes in activity, antigenicity, and molecular size of rice bran trypsin inhibitor by in vitro digestion." Journal of nutritional science and vitaminology **42**(4): 367-376.
- Tenore, G. C., A. Ritieni, et al. (2015). "Antioxidant peptides from "Mozzarella di Bufala Campana DOP" after simulated gastrointestinal digestion: In vitro intestinal protection, bioavailability, and anti-haemolytic capacity." Journal of Functional Foods **15**: 365-375.
- Tesoriere, L., M. Fazzari, et al. (2008). "In vitro digestion of betalainic foods. Stability and bioaccessibility of betaxanthins and betacyanins and antioxidative potential of food digesta." Journal of agricultural and food chemistry **56**(22): 10487-10492.
- Thakkar, S. K., B. Maziya-Dixon, et al. (2007). " $\beta$ -Carotene micellarization during in vitro digestion and uptake by Caco-2 cells is directly proportional to  $\beta$ -carotene content in different genotypes of cassava." The Journal of nutrition **137**(10): 2229-2233.
- Tobin, B. D., M. G. O'Sullivan, et al. (2014). "Effect of cooking and in vitro digestion on the stability of co-enzyme Q10 in processed meat products." Food Chemistry **150**: 187-192.
- Tohmé, M., S. Maschalidi, et al. (2013). In Vitro Digestion with Proteases Producing MHC Class II Ligands. Antigen Processing, Springer: 509-515.
- Tyl, C. E. and M. Bunzel (2014). "Activity-Guided Fractionation to Identify Blue Wheat (UC66049 *Triticum aestivum* L.) Constituents Capable of Inhibiting In Vitro Starch Digestion." Cereal Chemistry **91**(2): 152-158.
- Tzoumaki, M. V., T. Moschakis, et al. (2013). "In vitro lipid digestion of chitin nanocrystal stabilized o/w emulsions." Food & function **4**(1): 121-129.
- Ulleberg, E. K., I. Comi, et al. (2011). "Human gastrointestinal juices intended for use in in vitro digestion models." Food Digestion **2**(1-3): 52-61.
- Vachon, C., S. GAUTHIER, et al. (1987). "Relationship between in vitro digestion of proteins and in vivo assessment of their nutritional quality." Reproduction Nutrition Développement **27**(3): 659-672.
- Van de Wiele, T., C. M. Gallawa, et al. (2010). "Arsenic metabolism by human gut microbiota upon in vitro digestion of contaminated soils." Environmental health perspectives: 1004-1009.
- van den Braak, C. C., M. Klebach, et al. (2013). "A novel protein mixture containing vegetable proteins renders enteral nutrition products non-coagulating after in vitro gastric digestion." Clinical Nutrition **32**(5): 765-771.
- Van Hecke, T., J. Vanden Bussche, et al. (2014). "Nitrite curing of chicken, pork, and beef inhibits oxidation but does not affect N-nitroso compound (NOC)-specific DNA adduct

- formation during in vitro digestion." Journal of agricultural and food chemistry **62**(8): 1980-1988.
- Van Hecke, T., E. Vossen, et al. (2014). "Fat content and nitrite-curing influence the formation of oxidation products and NOC-specific DNA adducts during in vitro digestion of meat."
- Vaštag, Ž., L. Popović, et al. (2013). "In vitro study on digestion of pumpkin oil cake protein hydrolysate: Evaluation of impact on bioactive properties." International journal of food sciences and nutrition **64**(4): 452-460.
- Veličković, D., A. Dimitrijević, et al. (2012). "Novel glycoside of vanillyl alcohol, 4-hydroxy-3-methoxybenzyl- $\alpha$ -d-glucopyranoside: study of enzymatic synthesis, in vitro digestion and antioxidant activity." Bioprocess and biosystems engineering **35**(7): 1107-1115.
- Venkatachalam, M., S. S. Teuber, et al. (2006). "Antigenic stability of pecan [*Carya illinoensis* (Wangenh.) K. Koch] proteins: effects of thermal treatments and in vitro digestion." Journal of agricultural and food chemistry **54**(4): 1449-1458.
- Vermeirssen, V., J. Van Camp, et al. (2003). "The impact of fermentation and in vitro digestion on the formation of angiotensin-I-converting enzyme inhibitory activity from pea and whey protein." Journal of Dairy Science **86**(2): 429-438.
- Verrijssen, T. A., S. H. Verkempinck, et al. (2015). "The effect of pectin on in vitro  $\beta$ -carotene bioaccessibility and lipid digestion in low fat emulsions." Food Hydrocolloids **49**: 73-81.
- Versantvoort, C. H., A. G. Oomen, et al. (2005). "Applicability of an in vitro digestion model in assessing the bioaccessibility of mycotoxins from food." Food and chemical toxicology **43**(1): 31-40.
- Villemejeane, C., R. Wahl, et al. (2015). "In vitro digestion of short-dough biscuits enriched in proteins and/or fibres, using a multi-compartmental and dynamic system (1): Viscosity measurement and prediction." Food Chemistry **182**: 55-63.
- Wada, Y. and B. Lönnerdal (2015). "Bioactive peptides released from in vitro digestion of human milk with or without pasteurization." Pediatric research **77**(4): 546-553.
- Walczak, A. P., R. Fokkink, et al. (2012). "Behaviour of silver nanoparticles and silver ions in an in vitro human gastrointestinal digestion model." Nanotoxicology **7**(7): 1198-1210.
- Walk, C., M. Bedford, et al. (2012). "Influence of diet, phytase, and incubation time on calcium and phosphorus solubility in the gastric and small intestinal phase of an in vitro digestion assay." Journal of animal science **90**(9): 3120-3125.
- Walsh, K. R., Y. C. Zhang, et al. (2003). "Stability and bioaccessibility of isoflavones from soy bread during in vitro digestion." Journal of agricultural and food chemistry **51**(16): 4603-4609.
- Wang, C., H.-Y. Duan, et al. (2014). "Assessment of microwave cooking on the bioaccessibility of cadmium from various food matrices using an in vitro digestion model." Biological Trace Element Research **160**(2): 276-284.
- Wang, C., B. Li, et al. (2015). "Degradation and antioxidant activities of peptides and zinc-peptide complexes during in vitro gastrointestinal digestion." Food Chemistry **173**: 733-740.
- Wang, H.-S., Y.-B. Man, et al. (2010). "Oral bioaccessibility of polycyclic aromatic hydrocarbons (PAHs) through fish consumption, based on an in vitro digestion model." Journal of agricultural and food chemistry **58**(21): 11517-11524.

- Warren, F. J., B. Zhang, et al. (2015). "The interplay of  $\alpha$ -amylase and amyloglucosidase activities on the digestion of starch in in vitro enzymic systems." Carbohydrate polymers **117**: 192-200.
- Wen, S., G. Zhou, et al. (2014). "Effect of Cooking on in Vitro Digestion of Pork Proteins: A Peptidomic Perspective." Journal of agricultural and food chemistry **63**(1): 250-261.
- Werner, S. and V. Böhm (2011). "Bioaccessibility of carotenoids and vitamin E from pasta: evaluation of an in vitro digestion model." Journal of agricultural and food chemistry **59**(4): 1163-1170.
- Wickham, M., R. Faulks, et al. (2009). "In vitro digestion methods for assessing the effect of food structure on allergen breakdown." Molecular nutrition & food research **53**(8): 952-958.
- Williams, H. D., P. Sassene, et al. (2012). "Toward the establishment of standardized in vitro tests for lipid-based formulations, part 1: method parameterization and comparison of in vitro digestion profiles across a range of representative formulations." Journal of pharmaceutical sciences **101**(9): 3360-3380.
- Williams, H. D., P. Sassene, et al. (2013). "Toward the establishment of standardized in vitro tests for lipid-based formulations, part 3: understanding supersaturation versus precipitation potential during the in vitro digestion of Type I, II, IIIA, IIIB and IV lipid-based formulations." Pharmaceutical research **30**(12): 3059-3076.
- Wortley, G., S. Leusner, et al. (2005). "Iron availability of a fortified processed wheat cereal: a comparison of fourteen iron forms using an in vitro digestion/human colonic adenocarcinoma (CaCo-2) cell model." British Journal of Nutrition **93**(01): 65-71.
- Wu, L.-S., Z.-X. Li, et al. (2015). "In-vitro simulated gastric fluid digestion and immunogenicity of different crustacean protein extracts." International Journal of Food Properties **18**(1): 43-53.
- Wu, L., L. Sanguansri, et al. (2014). "Protection of epigallocatechin gallate against degradation during in vitro digestion using apple pomace as a carrier." Journal of agricultural and food chemistry **62**(50): 12265-12270.
- Wu, Q., X. P. Fu, et al. (2015). "Effects of physicochemical factors and in vitro gastrointestinal digestion on antioxidant activity of R-phycoerythrin from red algae *Bangia fuscopurpurea*." International Journal of Food Science & Technology **50**(6): 1445-1451.
- Xie, N., S. Liu, et al. (2014). "Stability of casein antioxidant peptide fractions during in vitro digestion/Caco-2 cell model: characteristics of the resistant peptides." European Food Research and Technology **239**(4): 577-586.
- Xing, G. H., Y. Yang, et al. (2008). "Bioaccessibility of polychlorinated biphenyls in different foods using an in vitro digestion method." Environmental pollution **156**(3): 1218-1226.
- Xu, D., F. Yuan, et al. (2014). "Influence of whey protein-beet pectin conjugate on the properties and digestibility of  $\beta$ -carotene emulsion during in vitro digestion." Food Chemistry **156**: 374-379.
- Yao, L., J. K. Friel, et al. (2010). "Antioxidant properties of breast milk in a novel in vitro digestion/enterocyte model." Journal of pediatric gastroenterology and nutrition **50**(6): 670-676.
- Yasumaru, F. and D. Lemos (2014). "Species specific in vitro protein digestion (pH-stat) for fish: method development and application for juvenile rainbow trout (*Oncorhynchus mykiss*),

cobia (*Rachycentron canadum*), and Nile tilapia (*Oreochromis niloticus*)." Aquaculture **426**: 74-84.

Ye, A., J. Cui, et al. (2013). "Effect of calcium on the kinetics of free fatty acid release during in vitro lipid digestion in model emulsions." Food Chemistry **139**(1): 681-688.

Yi, J., T. I. Lam, et al. (2014). "Controlled release of  $\beta$ -carotene in  $\beta$ -lactoglobulin–dextran-conjugated nanoparticles' in vitro digestion and transport with Caco-2 monolayers." Journal of agricultural and food chemistry **62**(35): 8900-8907.

Yonekura, L., H. Sun, et al. (2014). "Microencapsulation of *Lactobacillus acidophilus* NCIMB 701748 in matrices containing soluble fibre by spray drying: Technological characterization, storage stability and survival after in vitro digestion." Journal of Functional Foods **6**: 205-214.

Yu, Y., S. Han, et al. (2008). "Factors affecting the bioaccessibility of polybrominated diphenylethers in an in vitro digestion model." Journal of agricultural and food chemistry **57**(1): 133-139.

YuHua, W., T. ChinPing, et al. (2014). "In vitro simulated digestion on the biostability of *Hibiscus cannabinus* L. seed extract." Czech Journal of Food Sciences **32**(2): 177-181.

Zhang, S. and B. Vardhanabhuti (2014). "Effect of initial protein concentration and pH on in vitro gastric digestion of heated whey proteins." Food Chemistry **145**: 473-480.

Zhang, S. and B. Vardhanabhuti (2014). "Intragastric gelation of whey protein–pectin alters the digestibility of whey protein during in vitro pepsin digestion." Food & function **5**(1): 102-110.

Zhang, Y. and Q. Zhong (2015). "Multiple-layered coatings on l-glutamine solid microparticles for the retention during storage and enteric delivery during in vitro digestions." Food Hydrocolloids **43**: 584-592.

Zheng, L., J. Ren, et al. (2013). "Comparison of in vitro digestion characteristics and antioxidant activity of hot-and cold-pressed peanut meals." Food Chemistry **141**(4): 4246-4252.

Zhou, Y., X. Gao, et al. (2014). "Bioaccessibility and safety assessment of trace elements from decoction of "Zhebawei" herbal medicines by in vitro digestion method." Journal of Trace Elements in Medicine and Biology **28**(2): 173-178.

Zhu, X., A. Ye, et al. (2013). "Free fatty acid profiles of emulsified lipids during in vitro digestion with pancreatic lipase." Food Chemistry **139**(1): 398-404.

Zou, L.-q., S.-f. Peng, et al. (2014). "Improved in vitro digestion stability of (–)-epigallocatechin gallate through nanoliposome encapsulation." Food Research International **64**: 492-499.

Zou, L., S. Peng, et al. (2015). "A novel delivery system dextran sulfate coated amphiphilic chitosan derivatives-based nanoliposome: Capacity to improve in vitro digestion stability of (–)-epigallocatechin gallate." Food Research International **69**: 114-120.
